# Supplementary material
Source: PubMed Central journal article supplement (PMC4850304)

## SUPPLEMENTARY MATERIAL

Supplementary material contains the structural analysis of cytidine isolated from exosporium of WT *B. cereus* by  $^1\text{H-NMR}$ , the ROESY  $^1\text{H-}^1\text{H}$  NMR analysis of the major tetrasaccharide of LMWG fraction from WT-BclA-Bc and the NMR analysis of HMWG fraction from WT-BclA-Bc.

**Figure S1** -  $^1\text{H-NMR}$  analysis of cytidine isolated from LMWG WT-BclA-Bc in RP-HPLC at 17.8 min (Fig. 2).

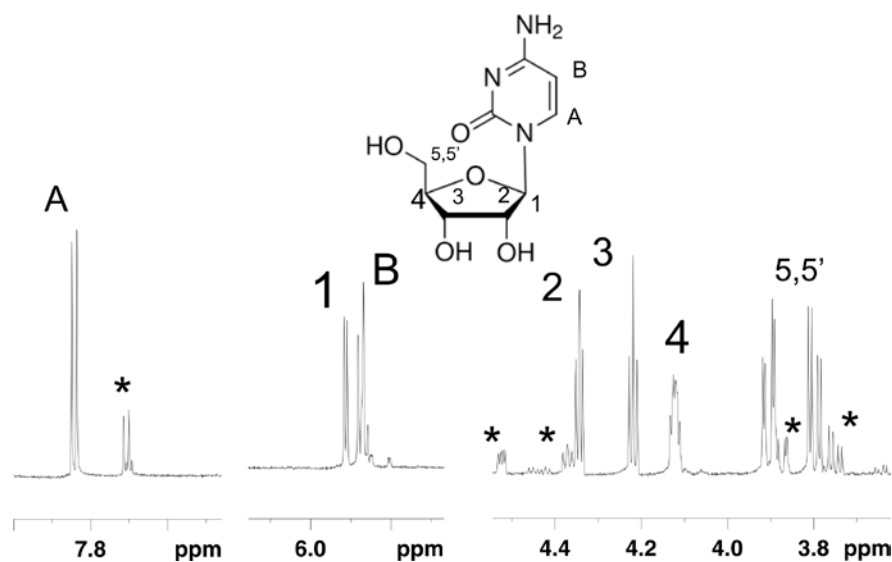

**Table S1:** Proton chemical shifts of cytidine isolated from LMWG WT-BclA-Bc in RP-HPLC at 17.8 min (Fig. 2).

|              | Protons chemical shifts (ppm) |      |      |      |           |      |      |
|--------------|-------------------------------|------|------|------|-----------|------|------|
|              | 1                             | 2    | 3    | 4    | 5         | A    | B    |
| $^1\text{H}$ | 5.91                          | 4,34 | 4.22 | 4.12 | 3.90/3.80 | 7.84 | 5.87 |

**Figure S2** - ROESY NMR analysis of major tetrasaccharide of LMWG fraction from WT-BclA-Bc. ROESY (in black) and TOCSY (in red) signals are superimposed and established the sequence III-II-I-ol.

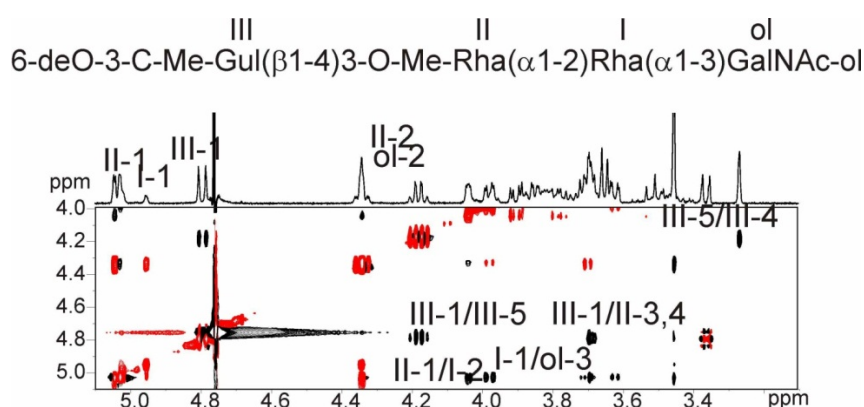

**Figure S3 - NMR analysis of HMWG fraction from WT-BclA-Ba.** (A)  $^1\text{H}$ -NMR spectrum; (B)  $^1\text{H}$ - $^{13}\text{C}$  HSQC spectrum and (C)  $^1\text{H}$ - $^1\text{H}$  TOCSY spectrum.

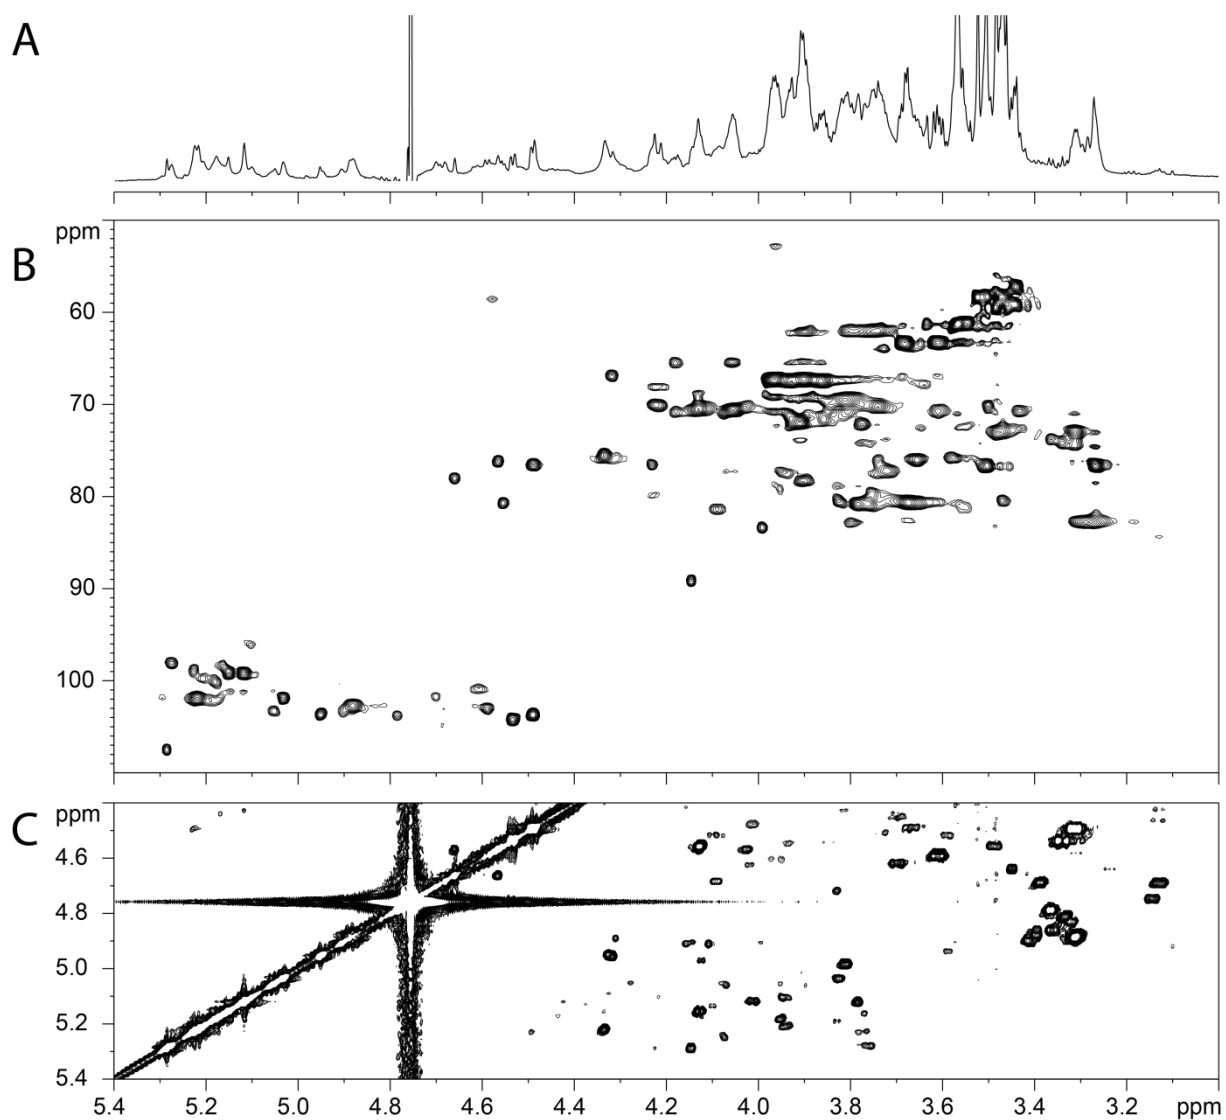

Supplement: 10.1074_M116.718171_jbc.M116.718171-1.pdf [file 10.1074_M116.718171_jbc.M116.718171-1.pdf]
